# Supplementary figures and images for: Silencing UBQLN2 Enhances the Radiosensitivity of Esophageal Squamous Cell Carcinoma (ESCC) via Activating p38 MAPK
Source: Hindawi journal article supplement (doi:10.1155/2023/2339732), 2023-01-05

## Ec109

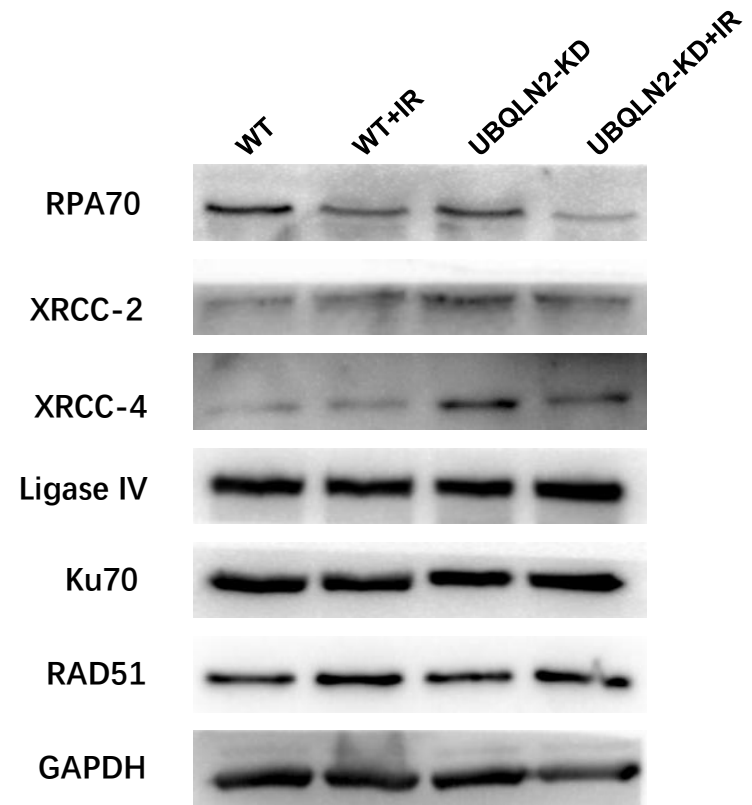

## KYSE-30

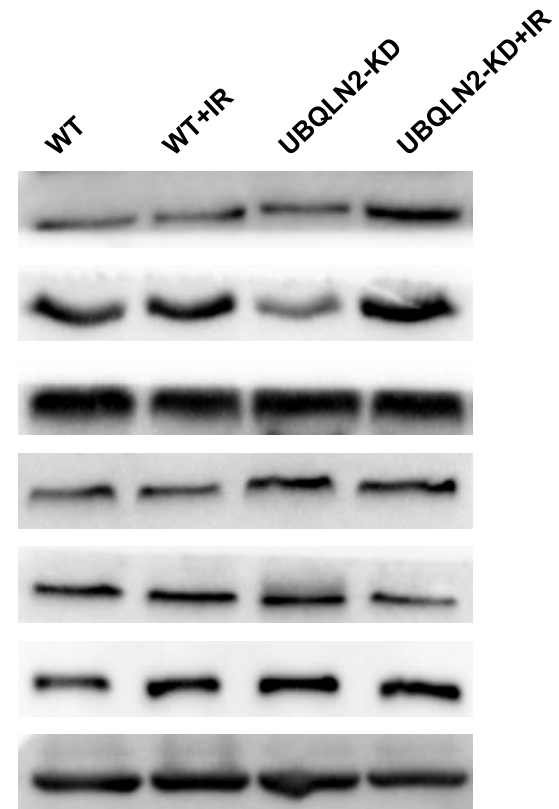

Supplement: f1 [file 2339732.f1.zip]

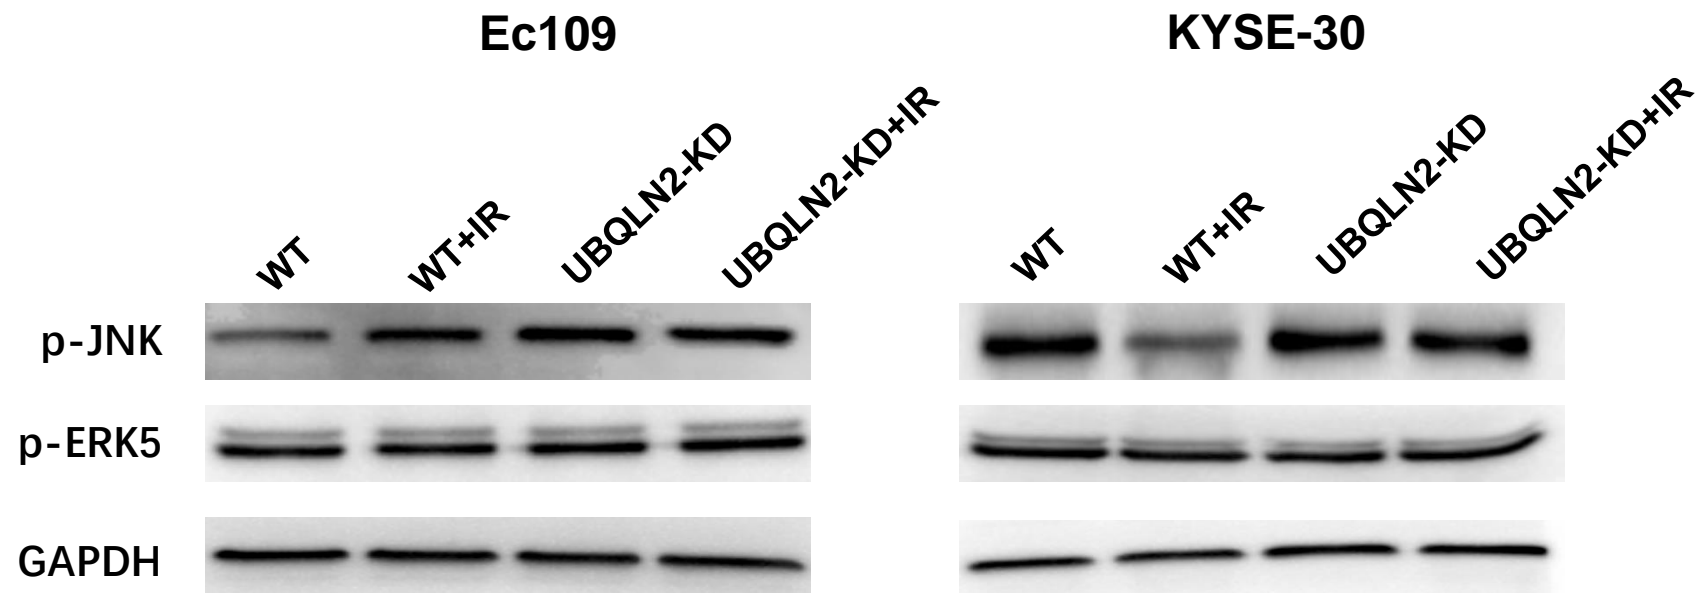

Supplement: f1 [file 2339732.f1.zip]
